# Supplementary material for: P40 and P75 Are Singular Functional Muramidases Present in the Lactobacillus casei /paracasei/rhamnosus Taxon
Source: PubMed Central journal article supplement (PMC6607858; doi:10.3389/fmicb.2019.01420), 2019-06-26
Supplement: Data_Sheet_1.pdf [file Data_Sheet_1.pdf]

## Supplementary Material

### P40 and P75 are singular functional muramidases typically found in the *Lactobacillus casei/paracasei/rhamnosus* taxon

Christine Bäuerl<sup>1#</sup>, Gulyaim Abitayeva<sup>2, 4#</sup>, Sebastián Sosa Carrillo<sup>3</sup>, Ana Mencher Beltrán<sup>1</sup>, Noemí Navarro Lleo<sup>1</sup>, José M. Coll Marqués<sup>1</sup>, Manuel Zúñiga Cabrera<sup>1</sup>, Serik Shaikhin<sup>2</sup> and Gaspar Pérez Martínez<sup>1\*</sup>

# Both authors contributed equally to the work

\*Corresponding autor:

Gaspar Pérez Martínez: [gaspar.perez@iata.csic.es](mailto:gaspar.perez@iata.csic.es)

#### 1. Supplementary Figure Legends

**Figure S1.-** Translation of the *cmuA* gene encoding protein P40. Sequences encoding domains CwlO (COG3883) and Nlpc/P60 are shadowed and indicated. Putative active triad amino acid residues C-H-N tentatively deduced from the consensus described by Aramini *et al.* (Aramini *et al.*, 2008) are marked in bold and underlined.

**Figure S2.-** Alignment of *cmuB* gene and *mSPa* genes encoding P75 in *L.casei* BL23 and *L.rhamnosus* GG. Shadowed sequences indicate the location of Tandem Repeats in *L.casei* BL23.

**Figure S3.-** Complete PAGE picture of Figure 3.

**Figure S4.-** 3D *in silico* modeling of the structure of P40 and P75. The structural models were built using RaptorX2 (<http://raptorx2.uchicago.edu/StructurePropertyPred/predict/>) (Källberg *et al.*, 2012; Wang *et al.*, 2016). Unfortunately, no 3D structures have been determined of homologous proteins that would allow fully reliable structural predictions. We selected the RaptorX2 model because for P40 there was a moderately satisfactory prediction based on PDB template 4cgkA corresponding to the CHAP domain-containing protein of *Streptococcus pneumoniae* R6 [WP\_000727012.1]. fGlobal distance test (GDT) was 49% and P-value  $1.9 \times 10^{-5}$ , that suggest at least a good partial prediction. SWISS-MODEL (<https://swissmodel.expasy.org/>) (Waterhouse *et al.*, 2018) was also used for P40 using PcsB from *Streptococcus pneumoniae* and RipA from *Mycobacterium tuberculosis* as templates (PDB nos. 4cgk.1.A and 6ewy.1.A) (35% and 28% similarity) and the general configuration was similar to that found with RaptorX2. In the case of P75, the highest P-value and GDT were found with templates 3pvqA (p=  $2.6 \times 10^9$ , GDT= 38%), 6bimA (p=  $3.4 \times 10^9$ , GDT=

36%) and 3h41A ( $p= 2.8 \times 10^8$ , GDT= 35%), which are respectively the NlpC/P60 family protein of *Bacteroides thetaiotaomicron* [WP\_011107705.1], C40-NlpC/P60 superfamily cysteine peptidase from *Trichomonas vaginalis* G3 [XP\_001276902.1] and the NlpC/P60 family protein of *Bacillus cereus* [WP\_061182922.1]. This could be interpreted as suboptimal structural predictions, that again are due to the lack of more similar references.

**Figure S5.-** Lytic activity assay of P40 and P75 against *L.casei*, *E. faecalis*, *L. monocytogenes* and *S. aureus*. (A) pH optimization. (B) Effect of the proteins and Triton after 2 hours of incubation at the selected pH.

**Figure S6.-** Western blot obtained using anti-P40 polyclonal antibodies isolated from purified native P40 (Yan et al., 2007).

## 2. Supplementary Tables

3. **Table S1.-** List of putative proteins containing C-terminal NlpC/P60 domain in the annotated genomes of representative strains of *Lactobacillus* and *Lactococcus*, as an illustration of their abundance.

| Species_Strain                                                  | Ref. Genome annotation                      | Accession numbers - Annotated function                                                                                                                                                                                                                                                |
|-----------------------------------------------------------------|---------------------------------------------|---------------------------------------------------------------------------------------------------------------------------------------------------------------------------------------------------------------------------------------------------------------------------------------|
| <i>Lactobacillus casei</i> BL23                                 | (Maze et al., 2010)                         | WP_003572828.1 - CHAP domain-containing protein[P40]<br>WP_012490875.1 - NlpC/P60 family protein[P75]<br>WP_012491782.1 - hypothetical protein<br>WP_012491062.1 - hydrolase                                                                                                          |
| <i>Lactobacillus rhamnosus</i> GG                               | (Kankainen et al., 2009)                    | AXI93082.1 CHAP - domain-containing protein[P40]<br>AXI93342.1- glycoside hydrolase [P75]<br>AXI94896.1 - hypothetical protein DU507_10550                                                                                                                                            |
| <i>Lactococcus lactis subsp cremoris</i> MG1363                 | (Wegmann et al., 2007;Linares et al., 2010) | AAA25230- secreted protein<br>CAL97110 - conserved hypothetical protein<br>CAC93672 - gamma-glutamyl-diamino acid-endopeptidase                                                                                                                                                       |
| <i>Lactobacillus plantarum</i> WCFS1                            | (Siezen et al., 2012)                       | WP_060677571.1 - NlpC/P60 family protein<br>WP_011101812.1 - NlpC/P60 family protein<br>WP_011101674.1- peptidoglycan endopeptidase<br>WP_011102154.1 - LysM peptidoglycan-binding domain-containing protein<br>WP_011101331.1 - gamma-D-glutamate-meso-diaminopimelate muropeptidase |
| <i>Lactobacillus delbrueckii subsp. bulgaricus</i> ATCC BAA-365 | (van de Guchte et al., 2006)                | ABJ59268.1 -Cell wall-associated hydrolase<br>ABJ57819.1 - Cell wall-associated hydrolase<br>ABJ59266.1 - Cell wall-associated hydrolase<br>ABJ59129.1 - dipeptidyl-peptidase VI, Cysteine peptidase, MEROPS family C40<br>ABJ59265.1 - Cell wall-associated hydrolase                |
| <i>Lactobacillus brevis</i> ATCC 367                            | (Makarova et al., 2006)                     | ABJ64517.1 - Cell wall-associated hydrolase<br>ABJ63531.1 - D-alanyl-D-alanine carboxypeptidase<br>ABJ64515.1 - Cell wall-associated hydrolase                                                                                                                                        |
| <i>Lactobacillus gasseri</i> ATCC 33323                         | (Makarova et al., 2006)                     | ABJ60987.1 - Cell wall-associated hydrolase                                                                                                                                                                                                                                           |

**Table S2.- FASTA sequences of BL23 *cmuB* gene and *L. paracasei* variants of minisatellites.**

```
>NC_010999.1:277055-278539 Lactobacillus casei BL23 complete genome, strain BL23
> ref|NC_010999.1
ATGGTAGATGCAAAGAAAGTATTGTACAGTTACGGCAGGATTCGTTGGTGCTGCCGGTTTGGCAACTTTAG
CTACCGGCGCTAATACTGTTTCCGCTTCAACGGGGACAGTCAATTACAAATCGGGTGCGACCACCGTATG
GAATAGTCCATCATGGCATCAAGTAAAACGCTATGTGACTTTTGGTGACAAAGTACAAGTTCTAGGTCAA
AAAGTTGACCGAAACCGTGCTACTTGGTATAAAGTCGGCGACAATCAGTGGATCCCTCTCATTTATTTGA
ATTTTACGGCAAGACTGTCAACCGTTCAAGCACCAGAACAACTGCCAGTCAGGCACCGGTTAGCCAAGC
GCCAGCTAGCCAAGCACCTGCAAGTCAAGCACCCTGCGAGTCAAGCAGCCGACAGCCTGATACCCAGACA
GCAAACATTCAGTTATATGTTAAAAACATTTGGTCTGCGAGTCACAGTTTGGGCAACACCAGCGTACAGTC
AGGCAACTGGCCAGTATCTGGAAGGCAACCAGACGTTGACGGCGGTTGCCAGTTGCAAGCCAATGGCGA
AACATGGTATCGGTTAGCAAATGGCGGTTACGTGCCAGAACGTTTTGCTAGCACAAACCTGCACCAGCA
CCGAGTCTATGCTGCAACGAGTGTGCGGCACCGACTGCGCCTGTATCTGATGCAACCGCTTCGAACG
CAGCTGCTTCAAATGCCCGCTTCGGATGTTGCTGCTCCAGTGTGCGAGCTCTAGTGCCGGGCTTC
ATTAGTGCCGCTTCAAGAGTGTGCTGCGGTTGCGAATGCTTCTAGCGCTGTGTCATCTTCTGCTGCCGCT
GTAGCGAGTGTGCCGAGAATCCAGTGTGCTGCGAGTCCAGTGTGCCGATCGAAGGCTGTGCTG
ATTCTAGCGCTGCAAGCTTTGACTGCTCAGGCTTGTATGATTTATGCCTTTTTGAACGGCGCGGTTAAC
TGCAACTCAGGAACAGCAACAGCAGGCAGAACCAAGCAATACGGTCAATACCGAGGAAACGACAAATAAC
GCGACCGCGACTCCTGCACCAACGCGACGCTGCACCAACCCAGCCCCAGCTCCTGTTACGCGCTCAC
GTCAGGCAAAAATTCAGGCGGTTATCTCAATTGCTGAACAGCAAATGGGAAACCTTATGTATGGGGTGG
GCAAGCTTAAACGCTTTGACTGCTCAGGCTTGTATGATTTATGCCTTTTTGAACGGCGCGGTTAAC
ATCGGTGGTTGGACAGTGCCACAAGAATCTTCTGGTCAGCAAGTCTCACTGAGTGCACCTCAGCCTGGTG
ATTTGCTTCTTGGGGCGGACATGGTAGCTCTTACCACGTAGCGCTTACATTTGGTGGCGGTACAATGAT
TCAGGCACCACAACCGGTTGAAAATGTGAAGTACACGGCATTAGCTTACTTCATGCCTGATTTTGTCTGTT
CGTCCCTCACATAA
```

**Lactobacillus paracasei strain Zhang, complete genome**

[gene](#)

294624..296105

[CDS](#)

```
/locus_tag="LCAZH_0300"
294624..296105
/locus_tag="LCAZH_0300"
/codon_start=1
/transl_table=11
/product="cell wall-associated hydrolase"
/protein_id="ADK17593.1"
/translation="MVDAKKVLVSVTAGFVGAAGLATLATGANTVSASTGTVNYKSGAT
TVWNSPSWHQVKRYVTFGDKVQVLGQKVDNRGATWYKVDNQWIPGIYLNFDGKTVTV
QAPEQTASQAPVSOAPASQAPASQAPASQAAAQPDQTATIQLYVKNIGSAVTVWATP
AYSQATGQYLEGNQTLTAVAQLQANGETWYRLANGGYVPERFASTTPAPAPQSSAATS
VAAPTAPVSDATASNAASDAAASAAAASAAAASLAVASEAAAASVANASSAAAASAAV
ASAAAESSTAESSAAAESSAAAASKAAADSSAAAVQTTTPESSAAPATTQVDATQEQQ
QQAEPISITVNAEETTNNATPTPAPTPTPAPTAPVTPSRQAKIAVISIAEQQIGKPY
VWGGKGPNSFDCSGLMYAFNLNGAGVNIIGWTVVPQESSGQVSLSALQPGDLLFWGGH
GSSYHVALYIGGGTMIQAPQPGENVKYTALAYFMPDFAVRPSL"
```

```
>CP001084.2:294624-296105 Lactobacillus paracasei strain Zhang, complete genome
ATGGTAGATGCAAAGAAAGTATTGTACAGTTACGGCAGGATTCGTTGGTGCTGCCGGTTTGGCAACTTTAG
CTACCGGCGCTAATACTGTTTCCGCTTCAACGGGGACAGTCAATTACAAATCGGGTGCGACCACCGTATG
GAATAGTCCATCATGGCATCAAGTAAAACGCTATGTGACTTTTGGTGACAAAGTACAAGTTCTAGGTCAA
AAAGTTGACCGAAACCGTGCTACTTGGTATAAAGTCGGCGACAATCAGTGGATCCCTGGCATTTATTTGA
ATTTTACGGCAAGACTGTCAACCGTTCAAGCACCAGAACAACTGCCAGTCAGGCACCGGTTAGCCAAGC
GCCAGCTAGCCAAGCACCTGCAAGTCAAGCACCCTGCGAGTCAAGCAGCCGACAGCCTGATACCCAGACA
GCAACCATTCAGTTATATGTTAAAAACATTTGGTCTGCGAGTCACCGTTTGGGCAACACCAGCGTACAGTC
AGGCAACTGGCCAGTATCTGGAAGGCAACCAGACGTTGACGGCGGTTGCCAGTTGCAAGCCAATGGCGA
AACATGGTATCGGTTAGCAAATGGCGGTTACGTGCCAGAACGTTTTGCTAGCACAAACCTGCACCAGCA
CCGAGTCTATGCTGCAACGAGTGTGCGGCACCGACTGCGCCTGTATCTGATGCAACCGCTTCGAACG
CAGCTGCTTCGGATGCTGCTGCCCTCAGTGCAGCGCTCCAGTGTGCGAGCTTCAATGGCTGTGCTGCTC
AGAAGCTGCTGCTTCGGTTCGAAATGCTTAGCGCTGCTGCATGCTGCTGCTGCTGCTGCTGCTGCTGCTG
GCAGAATCCAGTACGGCTGCAGAATCCAGTGTGCTGCGAGAATCCAGTGTGCTGCTGCTGCTGCTGCTG
CTGATTCAGCGCTGCGAGCTGTGCGACTACGACGCTGAGTCCAGTGTGCGCCTGCAACGACACAGGT
TGATGCAACTCAGGAACAGCAACAGCAGGCAGAACCAAGCATTACGGTCAATGCCAGGAAACGACAAAT
AACCGGACGCGACTCCTGCACCAACGCGCCTGCACCAACCCAGCCCCGTTACGCGCTCAGCTC
AGGCAAAAATTCAGGCGGTTATCTCAATTGCTGAACAGCAAATGGGAAACCTTATGTATGGGGTGGCAA
GGGTCTTAACAGCTTTGACTGCTCAGGCTTGTATGATTTATGCCTTTTTGAACGGCGCGGTTAACATC
GGTGGTTGGACAGTGCCACAAGAATCTTCTGGTCAGCAAGTCTCACTGAGTGCACCTCAGCCTGGTGATT
TGCTCTTCTGGGGCGGACATGGTAGCTCTTACCACGTAGCGCTTACATTTGGTGGCGGTACAATGATTC
GGCACCACAACCGGTTGAAAATGTGAAGTATACGGCATTAGCTTACTTCATGCCTGATTTTGTCTGCTG
CCTTACTATAA
```

**CP016355.1** *Lactobacillus paracasei* subsp. *paracasei* strain TMW 1.1434:

[gene](#) 307325..308785  
/locus\_tag="BBD24\_01395"  
[CDS](#) 307325..308785  
/locus\_tag="BBD24\_01395"  
/inference="EXISTENCE: similar to AA  
sequence:RefSeq:WP\_016363833.1"  
/note="Derived by automated computational analysis using  
gene prediction method: Protein Homology."  
/codon\_start=1  
/transl\_table=11  
/product="glycoside hydrolase"  
/protein\_id="AUB99713.1"  
/translation="MVDARKVLSVTAGFVGAAGLATLATGANTVSASTGTVNYKSGAT  
TVWNSPSWHQVKRYVTFGDKVQVVGQKVDNRGATWYKVGDNQWIPGIYLNFDGKTVTV  
QAPEQTASQAPVVSQAPASQAPASQAPASAAAQPDQTANIQLYVKNIGSAVTVWATP  
AYSQATGQYLEGNQTLTAVQLQANGETWYRLANGGYVPERFASTTPAPAPQSSAATS  
VAAPTAPVSDATASNAASNAASDAVSSAAASSAAAASLAAASLAAAVANASSAAAAS  
SAAAVASAAAESSAAAESSAAASKAAADSSAAAVQTTTPESSAAPATTQV DATQEQQQ  
QAEPSNTVNAEETTNNATPAPTAPAPVTPSRQAKIQAVISIAEQQIGKPYVWGGKGP  
NSFDCSGLMYAFLNGAGVNIIGWTVVPQESSGQVLSLALQPGDLLFWGGRGSSYHVA  
LYIGGGTMIQAPQPGENVKYTALAYFMPDFAVRPSL"

>CP016355.1:307325-308785 *Lactobacillus paracasei* subsp. *paracasei* strain TMW 1.1434 chromosome,  
complete genome

```
ATGGTAGATGCAAAGAAAGTATTGTACAGTTACGGCAGGATTCGTTGGTGCTGCCGGTTTGGCAACTTTAG
CTACCGGCGTAATACTGTTTCCGCTTCAACGGGGACAGTCAATTACAAATCGGGTGCGACCACCGTATG
GAATAGTCCATCATGGCATCAAGTAAAACGCTATGTGACTTTTGGTGACAAAGTACAAGTTCTAGGTCAA
AAAGTTGACCGAAACGGTGCTACTTGGTATAAAGTCGGCGACAATCAGTGGATCCCTGGCATTTATTGGA
ATTTTGACGGCAAGACTGTACCGTTCAGCACAGAACTGCCAGTCAGGCACCGGTAGCCAAGC
GCCAGCTAGCCAAGCACCTGCAAGTCAGGCACCTGCGAGTCAAGCAGCCGCACAGCCTGATACCCAGACA
GCAAACATTCAGTTATATGTTAAAAACATTGGTCTGCAGTCACAGTTTGGGCAACACCGCGTACAGTC
AGGCAACTGGCCAGTATCTGGAAGCCAAACCAGACGTTGACGGCGGTGCCCCAGTTGCAAGCCAATGGCGA
AACATGGTATCGGTTAGCAATGGCGGTTACGTGCCAGAACGTTTGGTATAGCACAAACACCTGCACCAGCA
CCGCAGTCTACTGTCAACAGAGTGTGCGGCACCGACTGCGCCTGTATCTGATGCAACCGCTTCGAACG
CAGCTGCTTCAATGCCGCCGTTCGGATGCTGCTGTCTCCAGTGTGCAGCGTCTAGTGCCTGGGCTTC
ATTAGCTGCCGCTTCAATTAGCTGTCTGCGGTTGCGAATGCTTCTAGCCTGTGCATCTTCTGCTGCCGCT
GTAGCGAGTGTGCCGAGAAATCCAGTGTGTGCAGAATCTAGTGTGTGCATCAAAGGCTGTGCTG
ATTCTAGCGCTGCAGCTGTGACAGTACGACGCTTCCAGTGTGCGCCTGCAACGACACAGGTTGA
TGCAACTCAGGAACAGCAACAGCAGGCAGAAACCAAGCAATACGGTCAATGCCGAGGAAACGACAAATAAC
GGCAGCCTGCACCAACCCGAGCCAGCTCCTGTTACGCGCTCAGTCAGGCAAAAATTCAGGCAGTTA
TCTCAATTGCTGAACAGCAAAATGGGAAACCTTATGTATGGGGTGGCAAGGGTCTTAACAGCTTTGACTG
CTCAGGCTTGTATATGCTTTTGAACGGCCGCGGTAAACATCGGTTGGTGGACAGTGCACAAA
GAATCTTCTGGTCAGCAAGTCTCAGTGTGACTTCAGCCTGGTGTGTTGCTTCTTGGGGCGGACGTTG
GTAGCTTACCAGTACGCTTACATTTGGTGGCGGTACAATGATTCAGGCACCACAACCGAGTTGAAA
TGTGAAGTATACGGCATTAGCTTACTTTCATGCTGATTTTTGCTGTTGCTCCTTACTATAA
```

**AP012541.1** *Lactobacillus paracasei* subsp. *paracasei* JCM 8130

[gene](#) 275403..276896  
/locus\_tag="LBPC\_0264"  
[CDS](#) 275403..276896  
/locus\_tag="LBPC\_0264"  
/codon\_start=1  
/transl\_table=11  
/product="putative cell wall-associated hydrolase"  
/protein\_id="BAN70560.1"  
/translation="MVDARKVLSVTAGFVGAAGLATLATGANTVSASTGTVNYKSGAT  
TVWNSPSWHQVKRYVTFGDKVQVVGQKVDNRGATWYKVGDNQWIPGIYLNFDGKTVTV  
QAPEQTASQAPVVSQAPASQAPASQAPASQAAATQPDQTANIQLYVKNIGSAVTVWATP  
AYSQATGQYLEGNQTLTAVQLQANGETWYRLANGGYVPERFASTTPAPAPQSSAATS  
VAAPTAPVSDATASNAASNAASDAVSSAAASSAAAASLAAASLAAAVANASSAAAAS  
SLAVASEAAASVANASSAAAASDAADSSAAAVQTTTPESSAAPATTQV DATQEQQQAE  
PSNTVNAEETTNNATPAPTPTPAPTPTPAPTAPAPVTPSRQAKIQAVISIAEQQI  
GKPYVWGGKGPNSFDCSGLMYAFLNGAGVNIIGWTVVPQESSGQVLSLALQPGDLLF  
WGGHSSYHVALYIGGGTMIQAPQPGENVKYTALAYFMPDFAVRPSL"

>AP012541.1:275403-276896 *Lactobacillus paracasei* subsp. *paracasei* JCM 8130 DNA, complete genome

```
ATGGTAGATGCAAAGAAAGTATTGTACAGTTACGGCAGGATTCGTTGGTGCTGCCGGTTTGGCAACTTTAG
CTACCGGCGTAATACTGTTTCCGCTTCAACGGGGACAGTCAATTACAAATCGGGTGCGACCACCGTATG
GAATAGTCCATCATGGCATCAAGTAAAACGCTATGTGACTTTTGGTGACAAAGTACAAGTTCTAGGTCAA
```

AAAGTTGACCGAAACGGTGCTACTTGGTATAAAGTCGGCGACAATCAGTGGATCCCTGGCATTATTTGA  
ATTTTGACGGCAAGACTGTCCCGTTCAAGCACCAGAACAACCTGCCAGTCAGGCACCGGTTAGCCAAGC  
GCCAGTAGCCAAGCACCTGCAAGTCAGGCACCTGCGAGTCAAGCAGCCACACAGCCTGATACCCAGACA  
GCAAACATTCAGTTATATGTTAAAAACATTGGTTCTGCAGTCACAGTTTGGGCAACACCAGCGTACAGTC  
AGGCAACTGGCCAGTATCTGGAAGGCAACCAGACGTTGACGGCGGTTGCCAGTTGCAAGCCAATGGCGA  
AACATGGTATCGGTTAGCAAATGGCGGTTACGTGCCAGAAGGTTTTGCTAGCACAAACCTGCACCAGCA  
CCGCAGTCATCTGCTGCAACAGAGTGTGCGGCACCGACTGCGCCTGTATCTGATGCAACGGCTTCGAACG  
CAGCTGCTTCAAATGCCGCGCTTCGGATGCTGCTGTCTCCAGTGTGCAGCGTCCAGTGCAGCGAGCGTC  
CAGTGCTGCAGCGTCCAGTGCCGCAGCGTCCAGTGCCGCAGCGTCCAGTGCCGCAGCGTCATTGGCTGTC  
GCTTCAGAAGCTGCTGCTTCGGTTGCAAATGCCTCTAGCGTCTGCATCGTCTGCTGCTGATTCTAGCG  
CTGCAGCTGTGCAGACTACGACGCTTGCAGTCCAGTGTGCGCCTGCAACGACACAGGTTGATGCAACTCA  
GGAACAGCAACAGCAGGCGAGAACCAAGCAATACGGTCAATGCCGAGGAAACGACAAATAACGCGACGCCG  
ACTCCTGCACCAACGCCGACTCTGCACCAACGCCGACTCCTGCACCAACCCAGCCCCAGCTCCTGTTA  
CGCCGTCACGTCAGGCAAAAATCAGCGGTTATCTCAATTGCTGAACAGCAAAATGGGAAACCTTATGT  
ATGGGGTGGCAAGGGTCTAACAGCTTTGACTGCTCAGGCTTGATGATTTATGCCTTTTTGAACGGCGCC  
GGTGTTAACATCGGTGGTTGGACAGTGCACACAAGAATCTTCTGGTCAGCAAGTCTCACTGAGTGCACCTC  
AGCCTGGTGATTGCTCTTCTGGGGCGGACATGGTAGCTCTTACCAGTAGCGCTTACATTTGGTGGCGG  
TACAATGATTCAGGCACCACAACCGGTGAAAATGTGAAGTATACGGCATTAGCTTACTTCAATGCCTGAT  
TTTGCTGTTGCTCCTTCACTATAA

**Tables S3.-** Sequences used in the phylogenetic analysis.

**Table S3.1.-** P40 homologous sequences used for phylogenetic reconstructions.

| <b>Strain</b>                                                 | <b>Acc. N°</b> |
|---------------------------------------------------------------|----------------|
| <i>Lactobacillus casei</i> BL23                               | CAQ65155       |
| <i>Lactobacillus paracasei</i> DUP 13076                      | WP_101869740   |
| <i>Lactobacillus paracasei</i> L9D                            | WP_071252149   |
| <i>Lactobacillus paracasei</i> subsp. <i>paracasei</i> Lpp221 | WP_016379272   |
| <i>Lactobacillus casei</i> subsp. <i>casei</i> ATCC 393       | WP_025013825   |
| <i>Lactobacillus rhamnosus</i> HN001                          | WP_005687968   |
| <i>Lactobacillus rhamnosus</i> GG                             | WP_014568889   |
| <i>Lactobacillus zeae</i> DSM 20178                           | WP_010490240   |
| <i>Lactobacillus sakei</i> subsp. <i>sakei</i> 23K 1          | WP_011374356   |
| <i>Lactobacillus sakei</i> subsp. <i>sakei</i> 23K 2          | WP_011373952   |
| <i>Lactobacillus murinus</i> DSM 20452                        | WP_004051788   |
| <i>Lactobacillus animalis</i> DSM 20602                       | KRM59177       |
| <i>Lactobacillus curvatus</i> MRS6                            | WP_089557112   |
| <i>Lactobacillus graminis</i> DSM 20719                       | WP_057908021   |
| <i>Lactobacillus fuchuensis</i> DSM 14340                     | WP_056950269   |
| <i>Lactobacillus manihotivorans</i> DSM 13343                 | WP_056964416   |
| <i>Lactobacillus nasuensis</i> JCM 17158                      | WP_054723415   |
| <i>Enterococcus asini</i> ATCC 700915                         | WP_010752994   |
| <i>Lactococcus lactis</i> subsp. <i>lactis</i> K337           | WP_058204561   |
| <i>Lactococcus piscium</i> DSM 6634                           | WP_096813813   |
| <i>Streptococcus equi</i> subsp. <i>ruminatorum</i> CECT 5772 | WP_037582442   |
| <i>Streptococcus pneumoniae</i> R6                            | WP_000727012   |
| <i>Streptococcus sanguinis</i> 2908                           | CEL91468       |
| <i>Vagococcus teuberi</i> DSM 21459                           | WP_071456026   |

**Table S3.2.-** P75 homologous sequences used for phylogenetic reconstructions.

| <b>Strain</b>                           | <b>Acc. N°</b> |
|-----------------------------------------|----------------|
| <i>Lactobacillus casei</i> BL23         | CAQ65403       |
| <i>Lactobacillus paracasei</i> lpp122 1 | WP_016383801   |
| <i>Lactobacillus paracasei</i> lpp122 2 | WP_016383443   |
| <i>Lactobacillus rhamnosus</i> GG       | WP_005687638   |

|                                                         |              |
|---------------------------------------------------------|--------------|
| <i>Lactobacillus casei</i> subsp. <i>casei</i> ATCC 393 | WP_025013844 |
| <i>Lactobacillus casei</i> LC5                          | WP_087911410 |
| <i>Lactobacillus zaeae</i> DSM 20178                    | WP_010492712 |
| <i>Lactobacillus nasuensis</i> JCM 17158                | WP_054723265 |
| <i>Lactobacillus cameliae</i> DSM 22697                 | WP_056989569 |
| <i>Lactobacillus fuchuensis</i> DSM 14340               | WP_056950327 |
| <i>Lactobacillus sakei</i> subsp. <i>sakei</i> 23K      | WP_011374023 |
| <i>Lactobacillus sakei</i> FAM18311                     | WP_076632543 |
| <i>Lactobacillus curvatus</i> FBA2                      | WP_064777492 |
| <i>Lactobacillus graminis</i> DSM 20719                 | WP_057907367 |
| <i>Lactobacillus amylophilus</i> DSM 20533              | WP_056947108 |
| <i>Lactobacillus helsingborgensis</i> Bma 5             | WP_046327598 |
| <i>Lactobacillus manihotivorans</i> DSM 13343           | WP_082611783 |
| <i>Lactobacillus perolens</i> DSM 12744                 | WP_083487735 |
| <i>Lactobacillus shenzhenensis</i> LY-73                | WP_081701288 |
| <i>Lactobacillus harbinensis</i> DSM 16991              | WP_027829605 |
| <i>Lactobacillus harbinensis</i> BM-LB13908             | WP_063516512 |
| <i>Lactobacillus farciminis</i> DSM 111452              | WP_059074409 |
| <i>Lactobacillus farciminis</i> DSM 20184               | WP_010020650 |
| <i>Lactobacillus futsaii</i> JCM 17355                  | WP_057811975 |
| <i>Lactobacillus kimchiensis</i> DSM 24716              | WP_057881517 |
| <i>Lactobacillus versmoldensis</i> DSM 14857            | WP_010624150 |
| <i>Lactobacillus ginsenosidimutans</i> EMMML 3041       | WP_048704780 |
| <i>Lactobacillus nodensis</i> DSM 19682                 | WP_056979871 |
| <i>Lactobacillus nantensis</i> DSM 16982                | WP_057891330 |
| <i>Lactobacillus heilongjiangensis</i> DSM 28069        | WP_041499677 |

**Table S4.-** Blast alignment of *L.casei/paracasei/rhamnosus* genes encoding P40 proteins for the selection of PCR primers

Database: Nucleotide collection (nt)  
36,527,618 sequences; 117,866,738,766 total letters  
Query= gi|191636824:c23411-22176 *Lactobacillus casei* BL23 complete genome,  
strain BL23  
Length=1236

| Sequences producing significant alignments:                                    | Score<br>(Bits) | E<br>Value |
|--------------------------------------------------------------------------------|-----------------|------------|
| emb HE970764.1  <i>Lactobacillus casei</i> W56 complete genome                 | 2283            | 0.0        |
| gb CP002618.1  <i>Lactobacillus casei</i> BD-II, complete genome               | 2283            | 0.0        |
| gb CP002616.1  <i>Lactobacillus casei</i> LC2W, complete genome                | 2283            | 0.0        |
| emb FM177140.1  <i>Lactobacillus casei</i> BL23 complete genome, str...        | 2283            | 0.0        |
| gb CP006690.1  <i>Lactobacillus casei</i> 12A, complete genome                 | 2067            | 0.0        |
| gb CP001084.2  <i>Lactobacillus casei</i> str. Zhang, complete genome          | 2061            | 0.0        |
| gb CP005486.1  <i>Lactobacillus casei</i> LOCK919, complete genome             | 2061            | 0.0        |
| gb CP005484.1  <i>Lactobacillus rhamnosus</i> LOCK900, complete genome         | 900             | 0.0        |
| dbj AP012544.1  <i>Lactobacillus casei</i> subsp. <i>casei</i> ATCC 393 DNA... | 889             | 0.0        |
| dbj AP011548.1  <i>Lactobacillus rhamnosus</i> ATCC 53103 DNA, compl...        | 883             | 0.0        |
| emb FM179322.1  <i>Lactobacillus rhamnosus</i> GG whole genome seque...        | 883             | 0.0        |

OLIGONUCLEOTIDES:  
LcasP40N for 5'- GTTGGATCCGATACAAGCGACAG (BAmHI  
LcasP40N rev 5'-GTAGGCCCTTATTGCTTATCAAAGC (SmaI) GCTTTGAATAAGC  
LcasP40C for 5'- GTTGGATCCGCTGATCATAAAGATG  
(BamHI)  
LcasP40C rev 5'-GTAGGCCCTTACCGGTGGATATAA (SmaI)  
TTATATCCACCGGTAA

For the L.rhamnosus sequences, see at the end full sequences

RhamP40N for 5'- GTTGGATCCGACACAAGTGCCAG (BamHI)

RhamP40N rev 5'-GTAGGGCCCTTATTCTTTGTTCAAAGC (SmaI)

GCTTTGAACAAAGAA

RhamP40C for 5'- GTTGGATCCGCTGATCACAAAGAC

(BamHI)

RhamP40C rev 5'-GTAGGGCCCTTACCGGTGGATGTAA (SmaI)

TTACATCCACCGGT

ALIGNMENTS

|          |       |                                                              |       |
|----------|-------|--------------------------------------------------------------|-------|
| Query    | 1     | ATGAAATTCAATAAAGTCATGATCACGTTGGTTGCTGCAGTTACCTTAGCAGGTTCTGCT | 60    |
| HE970764 | 23408 | .....                                                        | 23349 |
| CP002618 | 23409 | .....                                                        | 23350 |
| CP002616 | 23409 | .....                                                        | 23350 |
| FM177140 | 23411 | .....                                                        | 23352 |
| CP006690 | 22250 | .....                                                        | 22191 |
| CP001084 | 22759 | .....                                                        | 22700 |
| CP005486 | 20930 | .....                                                        | 20871 |
| CP005484 | 25290 | .....CA.....G..A.....A.....G.....T.                          | 25231 |
| AP012544 | 20379 | .....CT.....T..A.....C.....C.....C                           | 20438 |
| AP011548 | 31251 | .....CA.....G..A.....A.....G.....T.                          | 31192 |
| FM179322 | 31251 | .....CA.....G..A.....A.....G.....T.                          | 31192 |

|          |       |                                                               |       |
|----------|-------|---------------------------------------------------------------|-------|
| Query    | 61    | AGCGCCGTAACACCAGTTTTTCGCTGATACAAGCGACAGTATCGCTTCCAACAAAAGCGAA | 120   |
| HE970764 | 23348 | .....                                                         | 23289 |
| CP002618 | 23349 | .....                                                         | 23290 |
| CP002616 | 23349 | .....                                                         | 23290 |
| FM177140 | 23351 | .....                                                         | 23292 |
| CP006690 | 22190 | .....                                                         | 22131 |
| CP001084 | 22699 | .....                                                         | 22640 |
| CP005486 | 20870 | .....                                                         | 20811 |
| CP005484 | 25230 | .....G.....C.....T.C...C.....A..T....G.....                   | 25171 |
| AP012544 | 20439 | .....G.....C.....T.C...C.....T.....T.....                     | 20498 |
| AP011548 | 31191 | .....T.....G.....C.....T.C...C.....A..T....G.....             | 31132 |
| FM179322 | 31191 | .....T.....G.....C.....T.C...C.....A..T....G.....             | 31132 |

|          |       |                                                              |       |
|----------|-------|--------------------------------------------------------------|-------|
| Query    | 121   | ACCAATGCACTGTTGAAGCAAATTGAAGATGCGAACACAGAAGTTATCAATTTGAACAAG | 180   |
| HE970764 | 23288 | .....                                                        | 23229 |
| CP002618 | 23289 | .....                                                        | 23230 |
| CP002616 | 23289 | .....                                                        | 23230 |
| FM177140 | 23291 | .....                                                        | 23232 |
| CP006690 | 22130 | .....                                                        | 22071 |
| CP001084 | 22639 | .....                                                        | 22580 |
| CP005486 | 20810 | .....                                                        | 20751 |
| CP005484 | 25170 | .....C.ATT.A..A.....C.....CA..T.....T.....G.....CC.C.....    | 25111 |
| AP012544 | 20499 | ..G..C.ATT.A..A..A.....C.....CA..C.....T..G..C.....C.T.....A | 20558 |
| AP011548 | 31131 | .....C.ATT.A..A.....C.....CA..T.....T.....G.....CC.C.....A   | 31072 |
| FM179322 | 31131 | .....C.ATT.A..A.....C.....CA..T.....T.....G.....CC.C.....A   | 31072 |

|          |       |                                                              |       |
|----------|-------|--------------------------------------------------------------|-------|
| Query    | 181   | CAGATCGATACCAAGAATGGTCAAATCAGCGATGCAACGGCTAAGATCAGCGCAACTGAT | 240   |
| HE970764 | 23228 | .....                                                        | 23169 |
| CP002618 | 23229 | .....                                                        | 23170 |
| CP002616 | 23229 | .....                                                        | 23170 |
| FM177140 | 23231 | .....                                                        | 23172 |
| CP006690 | 22070 | .....                                                        | 22011 |
| CP001084 | 22579 | .....                                                        | 22520 |
| CP005486 | 20750 | .....                                                        | 20691 |
| CP005484 | 25110 | .....T...G.T.....CG.....T..C..T..T..C.....T.....G...         | 25051 |
| AP012544 | 20559 | .....T..CGAT.....TCG.....T.....C..A..C.....T.....C...        | 20618 |
| AP011548 | 31071 | .....T...G.T.....CG.....T..C..C..T..C.....T.....G...         | 31012 |
| FM179322 | 31071 | .....T...G.T.....CG.....T..C..C..T..C.....T.....G...         | 31012 |

|          |       |                                                              |       |
|----------|-------|--------------------------------------------------------------|-------|
| Query    | 241   | GCCAAGATTTCACTACTCAGCGGTGAAATTTGTTGCCGCTCAAAGAATGTCACAGCACGC | 300   |
| HE970764 | 23168 | .....                                                        | 23109 |
| CP002618 | 23169 | .....                                                        | 23110 |
| CP002616 | 23169 | .....                                                        | 23110 |
| FM177140 | 23171 | .....                                                        | 23112 |
| CP006690 | 22010 | .....                                                        | 21951 |
| CP001084 | 22519 | .....                                                        | 22460 |
| CP005486 | 20690 | .....                                                        | 20631 |
| CP005484 | 25050 | .....CG...GT.G..T..C.....ACC..T.....C...G...C..G             | 24991 |



|          |       |                                                               |       |
|----------|-------|---------------------------------------------------------------|-------|
| AP012544 | 20619 | ...C....CAA....T.G....CC....CACG..T..C.....C..G..G.....G      | 20678 |
| AP011548 | 31011 | .....CG....GT.G..T..C....CACC..T.....C...G...C..G             | 30952 |
| FM179322 | 31011 | .....CG....GT.G..T..C....CACC..T.....C...G...C..G             | 30952 |
| Query    | 301   | AAGAACAACCTGAAAAGATCAGTTGATCTCCTTGCaaaaaaGGCTGGCAACTCTGTCAGC  | 360   |
| HE970764 | 23108 | .....                                                         | 23049 |
| CP002618 | 23109 | .....                                                         | 23050 |
| CP002616 | 23109 | .....                                                         | 23050 |
| FM177140 | 23111 | .....                                                         | 23052 |
| CP006690 | 21950 | ..A.....                                                      | 21891 |
| CP001084 | 22459 | ..A.....                                                      | 22400 |
| CP005486 | 20630 | ..A.....                                                      | 20571 |
| CP005484 | 24990 | .....G....A....T...C.T....G..A..C...GT..A..T...               | 24931 |
| AP012544 | 20679 | .....C..AC...T...C.T....G....G...G..T...                      | 20738 |
| AP011548 | 30951 | .....G....A....T...C.T....G..A..C...GT..A..T...               | 30892 |
| FM179322 | 30951 | .....G....A....T...C.T....G..A..C...GT..A..T...               | 30892 |
| Query    | 361   | GGCAATGTCTATATCGACTTTGTTCTGAATTCAGAA-CT-TGTCTGACTTAATTGCC     | 418   |
| HE970764 | 23048 | .....-.-.....                                                 | 22991 |
| CP002618 | 23049 | .....-.-.....                                                 | 22992 |
| CP002616 | 23049 | .....-.-.....                                                 | 22992 |
| FM177140 | 23051 | .....-.-.....                                                 | 22994 |
| CP006690 | 21890 | .....-.-.....                                                 | 21833 |
| CP001084 | 22399 | .....-.-.....                                                 | 22342 |
| CP005486 | 20570 | .....-.-.....                                                 | 20513 |
| CP005484 | 24930 | .....T..T..C..GT...C..A...-G.C.A.....G.....                   | 24873 |
| AP012544 | 20739 | .....C.....C..GT...C..A..A.GT.-.-..G....G..C....              | 20796 |
| AP011548 | 30891 | .....T..T..C..GT...C..A...-G.C.A.....G.....                   | 30834 |
| FM179322 | 30891 | .....T..T..C..GT...C..A...-G.C.A.....G.....                   | 30834 |
| Query    | 419   | GCACCATGACGGTTGGCAAACCTTAGCCAAGCCAGCAAAGATGCGC-TT-GATGCCGTGAC | 476   |
| HE970764 | 22990 | .....-.-.....                                                 | 22933 |
| CP002618 | 22991 | .....-.-.....                                                 | 22934 |
| CP002616 | 22991 | .....-.-.....                                                 | 22934 |
| FM177140 | 22993 | .....-.-.....                                                 | 22936 |
| CP006690 | 21832 | .....-.-.....                                                 | 21775 |
| CP001084 | 22341 | .....-.-.....                                                 | 22284 |
| CP005486 | 20512 | .....-.-.....                                                 | 20455 |
| CP005484 | 24872 | ..T.....A..C....GT.A..T.....-.-..T..G....G..A..               | 24815 |
| AP012544 | 20797 | .....C.....C.....G..A...-G-..C..T....                         | 20854 |
| AP011548 | 30833 | ..T.....A..C....GT.A..T.....-.-..T..G....G..A..               | 30776 |
| FM179322 | 30833 | ..T.....A..C....GT.A..T.....-.-..T..G....G..A..               | 30776 |
| Query    | 477   | AGTTGCCAAGGATAAATTAGCTGGCTTGAAGACGGAACAGGAAAATGCCCGTCAGACGCT  | 536   |
| HE970764 | 22932 | .....                                                         | 22873 |
| CP002618 | 22933 | .....                                                         | 22874 |
| CP002616 | 22933 | .....                                                         | 22874 |
| FM177140 | 22935 | .....                                                         | 22876 |
| CP006690 | 21774 | .....                                                         | 21715 |
| CP001084 | 22283 | .....                                                         | 22224 |
| CP005486 | 20454 | .....                                                         | 20395 |
| CP005484 | 24814 | C..C....A....G....C..CT.....GT.....CG..A.....CT.              | 24755 |
| AP012544 | 20855 | C.....C...C..G..A..AC....ACC.....CA..G.....T.                 | 20914 |
| AP011548 | 30775 | C..C....A....G....C..CT.....GT.....CG..A.....CT.              | 30716 |
| FM179322 | 30775 | C..C....A....G....C..CT.....GT.....CG..A.....CT.              | 30716 |
| Query    | 537   | GGTTTCAACTAAGGC-T-TCATTGGAAACCCAGAAATCACAGTTGGTTTCCCTACAAAA   | 594   |
| HE970764 | 22872 | .....-.-.....                                                 | 22815 |
| CP002618 | 22873 | .....-.-.....                                                 | 22816 |
| CP002616 | 22873 | .....-.-.....                                                 | 22816 |
| FM177140 | 22875 | .....-.-.....                                                 | 22818 |
| CP006690 | 21714 | .....-.-.....                                                 | 21657 |
| CP001084 | 22223 | .....-.-.....                                                 | 22166 |
| CP005486 | 20394 | .....-.-.....                                                 | 20337 |
| CP005484 | 24754 | .....G....A..A.C...-.-...G..A..G....C.A.AGA...T....-          | 24698 |
| AP012544 | 20915 | .....C...T..-A-..GC.T.....G..T.....A..T.G....-                | 20971 |
| AP011548 | 30715 | .....G....A..A.C...-.-...G..A..G....C.A.AGA...T....-          | 30659 |
| FM179322 | 30715 | .....G....A..A.C...-.-...G..A..G....C.A.AGA...T....-          | 30659 |
| Query    | 595   | GA-TGCTAACGATAAACAAGATGCTTTGAATAAGCAAATGCTGATCATAAAGATGAGTT   | 653   |
| HE970764 | 22814 | ..-.....                                                      | 22756 |
| CP002618 | 22815 | ..-.....                                                      | 22757 |
| CP002616 | 22815 | ..-.....                                                      | 22757 |

|          |       |                                                              |       |
|----------|-------|--------------------------------------------------------------|-------|
| FM177140 | 22817 | ..-.....                                                     | 22759 |
| CP006690 | 21656 | ..-.....A.....                                               | 21598 |
| CP001084 | 22165 | ..-.....A.....                                               | 22107 |
| CP005486 | 20336 | ..-.....A.....                                               | 20278 |
| CP005484 | 24697 | ..CC..A.G...G.....C..AG.....C.....C...C..A..                 | 24638 |
| AP012544 | 20972 | ..CA...G...C...G.....C.....CAA...C..CCGT..C..A..             | 21031 |
| AP011548 | 30658 | ..CC..A.G...G.....C..AG.....C.....C...C..A..                 | 30599 |
| FM179322 | 30658 | ..CC..A.G...G.....C..AG.....C.....C...C..A..                 | 30599 |
| Query    | 654   | GGTTGCTTTGCAAAGCCAATTTGCTCAAGAACAGTCTGAAG-CAGCTGCTGCAACCCAAG | 712   |
| HE970764 | 22755 | .....-.....                                                  | 22697 |
| CP002618 | 22756 | .....-.....                                                  | 22698 |
| CP002616 | 22756 | .....-.....                                                  | 22698 |
| FM177140 | 22758 | .....-.....                                                  | 22700 |
| CP006690 | 21597 | .....C.....C.....-.....                                      | 21539 |
| CP001084 | 22106 | .....C.....C.....-.....                                      | 22048 |
| CP005486 | 20277 | .....C.....C.....-.....                                      | 20219 |
| CP005484 | 24637 | .....AC.C.....T.....A..A.....-.....CAAA.....G.               | 24579 |
| AP012544 | 21032 | A.....G...C..A..G.....-GAA...A.C.....G.....G.                | 21090 |
| AP011548 | 30598 | .....AC.C.....T.....A..A.....-.....CAAA.....G.               | 30540 |
| FM179322 | 30598 | .....AC.C.....T.....A..A.....-.....CAAA.....G.               | 30540 |
| Query    | 713   | CCGCTTTGAAGACCGTTGCCGCTTCAAC--C-GCAAGTTCTTCTA-C-----T-----A  | 757   |
| HE970764 | 22696 | .....--,-.....-.....-.....-.....                             | 22652 |
| CP002618 | 22697 | .....--,-.....-.....-.....-.....                             | 22653 |
| CP002616 | 22697 | .....--,-.....-.....-.....-.....                             | 22653 |
| FM177140 | 22699 | .....--,-.....-.....-.....-.....                             | 22655 |
| CP006690 | 21538 | .....--,-.....-.....-.....-.....                             | 21494 |
| CP001084 | 22047 | .....--,-.....-.....-.....-.....                             | 22003 |
| CP005486 | 20218 | .....--,-.....-.....-.....-.....                             | 20174 |
| CP005484 | 24578 | ..T..C.....A.CG..T..A.....TG.TT.....A..G-----C-----          | 24529 |
| AP012544 | 21091 | ..T.....G..C..T..A.....--,-.GTTC.G.A..A.G.AAGAG.GCCGAA.      | 21147 |
| AP011548 | 30539 | ..T..C.....A.CA..T..A.....TG.TT.....A.C.G-----CA----         | 30489 |
| FM179322 | 30539 | ..T..C.....A.CA..T..A.....TG.TT.....A.C.G-----CA----         | 30489 |
| Query    | 758   | C--C---AGCAGT-TC-A-AGC-AGCG-CAACTTCAA-CC--AGCAC-C-A-TCG---C  | 797   |
| HE970764 | 22651 | .....-.....-.....-.....-.....-.....-.....-.....              | 22612 |
| CP002618 | 22652 | .....-.....-.....-.....-.....-.....-.....-.....              | 22613 |
| CP002616 | 22652 | .....-.....-.....-.....-.....-.....-.....-.....              | 22613 |
| FM177140 | 22654 | .....-.....-.....-.....-.....-.....-.....-.....              | 22615 |
| CP006690 | 21493 | .....-.....-.....-.....-.....-.....-.....-.....              | 21454 |
| CP001084 | 22002 | ..-T-----                                                    | 21963 |
| CP005486 | 20173 | ..-T-----                                                    | 20134 |
| CP005484 | 24528 | A--,----TT..AA-,-,-..-..-..T.C...AG..G-TG--TT.T.T.G.C.G.TAC. | 24484 |
| AP012544 | 21148 | G--,----.....-..A.C.A.T.AG.-.TG.....G..AA.....-C..T---       | 21193 |
| AP011548 | 30488 | ..TT.AAAT.AG...GC.A.C...-..T.-TTCT...G.-T-G.T...-...-.....   | 30444 |
| FM179322 | 30488 | ..TT.AAAT.AG...GC.A.C...-..T.-TTCT...G.-T-G.T...-...-.....   | 30444 |
| Query    | 798   | -CAACAACACATCAAGTTCTTCAAACAACAGTTCTC--C-A-T---T-ATCAACAACAA  | 848   |
| HE970764 | 22611 | .....-.....-.....-.....-.....-.....                          | 22561 |
| CP002618 | 22612 | .....-.....-.....-.....-.....-.....                          | 22562 |
| CP002616 | 22612 | .....-.....-.....-.....-.....-.....                          | 22562 |
| FM177140 | 22614 | .....-.....-.....-.....-.....-.....                          | 22564 |
| CP006690 | 21453 | .....T...-T-G-,-...-...C.....                                | 21403 |
| CP001084 | 21962 | .....T...-T-G-,-...-...C.....                                | 21912 |
| CP005486 | 20133 | .....T...-T-G-,-...-...C.....                                | 20083 |
| CP005484 | 24483 | T..T...-..A.-.C...C..C...G.G..G...AT.T.C.G--.G...G..G...     | 24428 |
| AP012544 | 21194 | ..-..-...G.-.CC...C...G.G..G...AT.-.-.CCG.C...G...G...C      | 21247 |
| AP011548 | 30443 | ..T...-..A.-.C...C...G.G..G...AT.T.C.G--.G...G..G...         | 30389 |
| FM179322 | 30443 | ..T...-..A.-.C...C...G.G..G...AT.T.C.G--.G...G..G...         | 30389 |
| Query    | 849   | CACGACTTCAGGTAGCGGCAGTACGCTGATTACAGCAGTTCAGGCAACACGTATCCTTG  | 908   |
| HE970764 | 22560 | .....                                                        | 22501 |
| CP002618 | 22561 | .....                                                        | 22502 |
| CP002616 | 22561 | .....                                                        | 22502 |
| FM177140 | 22563 | .....                                                        | 22504 |
| CP006690 | 21402 | ..AG.....C..T...C.....C.T..TG...T...C.....                   | 21343 |
| CP001084 | 21911 | ..AG.....C..T...C.....C.T..TG...T...C.....                   | 21852 |
| CP005486 | 20082 | ..AG.....C..T...C.....C.T..TG...T...C.....                   | 20023 |
| CP005484 | 24427 | ..TG.....C..T...G.....T...T.....                             | 24368 |
| AP012544 | 21248 | ..CG.....C..T...T.C.....T.....                               | 21307 |
| AP011548 | 30388 | ..TG.....C..T...G.....T...T.....                             | 30329 |
| FM179322 | 30388 | ..TG.....C..T...G.....T...T.....                             | 30329 |

|          |       | P40_casrham_for1                                             | P40_casrham_for2 |       |
|----------|-------|--------------------------------------------------------------|------------------|-------|
| Query    | 909   | GGGTCAGTGCACCTGGTACGTCAAGTCAGTCGCTTCATGGGCTGGTAATGGCTGGGGCAA |                  | 968   |
| HE970764 | 22500 | .....                                                        | .....            | 22441 |
| CP002618 | 22501 | .....                                                        | .....            | 22442 |
| CP002616 | 22501 | .....                                                        | .....            | 22442 |
| FM177140 | 22503 | .....                                                        | .....            | 22444 |
| CP006690 | 21342 | .....A.....T..AC.....                                        | .....            | 21283 |
| CP001084 | 21851 | .....A.....T..AC.....                                        | .....            | 21792 |
| CP005486 | 20022 | .....A.....T..AC.....                                        | .....            | 19963 |
| CP005484 | 24367 | .....A.....T...T...T.....A..C.....                           | .....            | 24308 |
| AP012544 | 21308 | .....A.....T...T.....A..C.....                               | .....            | 21367 |
| AP011548 | 30328 | .....A.....T...T...T.....A..C.....                           | .....            | 30269 |
| FM179322 | 30328 | .....A.....T...T...T.....A..C.....                           | .....            | 30269 |
| Query    | 969   | TGGTGCCCAATGGGGTAGTTCGGCTGCAGCTGCTGGTTTCACAGTCAACCACACGCCAGC |                  | 1028  |
| HE970764 | 22440 | .....                                                        | .....            | 22381 |
| CP002618 | 22441 | .....                                                        | .....            | 22382 |
| CP002616 | 22441 | .....                                                        | .....            | 22382 |
| FM177140 | 22443 | .....                                                        | .....            | 22384 |
| CP006690 | 21282 | C..C..A.....C....A..C....A....C....T..T.....                 | .....            | 21223 |
| CP001084 | 21791 | C..C..A.....C....A..C....A....C....T..T.....                 | .....            | 21732 |
| CP005486 | 19962 | C..C..A.....C....A..C....A....C....T..T.....                 | .....            | 19903 |
| CP005484 | 24307 | C.....TG.....CGC.....A..C..C.....G..T.....C..G..             | .....            | 24248 |
| AP012544 | 21368 | C..C..TG.....CGC.....A..C..G..T.....A..G..                   | .....            | 21427 |
| AP011548 | 30268 | C.....TG.....CGC.....A..C..C.....G..T.....C..G..             | .....            | 30209 |
| FM179322 | 30268 | C.....TG.....CGC.....A..C..C.....G..T.....C..G..             | .....            | 30209 |
| Query    | 1029  | AGCCGGTTCAATCATCGTCTTCGCCGCTGGTCAATCTGTTGGCGGTCAATGGACAGCCGA |                  | 1088  |
| HE970764 | 22380 | .....                                                        | .....            | 22321 |
| CP002618 | 22381 | .....                                                        | .....            | 22322 |
| CP002616 | 22381 | .....                                                        | .....            | 22322 |
| FM177140 | 22383 | .....                                                        | .....            | 22324 |
| CP006690 | 21222 | .....C.....C.....                                            | .....            | 21163 |
| CP001084 | 21731 | .....C.....C.....                                            | .....            | 21672 |
| CP005486 | 19902 | .....C.....C.....                                            | .....            | 19843 |
| CP005484 | 24247 | ..A.....C.....T.....T.....                                   | .....            | 24188 |
| AP012544 | 21428 | .....C.....T.....T.....C....A.....C.....T..T..               | .....            | 21487 |
| AP011548 | 30208 | ..A.....C.....T.....C.....T.....                             | .....            | 30149 |
| FM179322 | 30208 | ..A.....C.....T.....C.....T.....                             | .....            | 30149 |
| Query    | 1089  | TGGTTCATACGGTACGTTGCTTACGTCCAATCTGTCTCTGGTGACAGTGCACGATCAG   |                  | 1148  |
| HE970764 | 22320 | .....                                                        | .....            | 22261 |
| CP002618 | 22321 | .....                                                        | .....            | 22262 |
| CP002616 | 22321 | .....                                                        | .....            | 22262 |
| FM177140 | 22323 | .....                                                        | .....            | 22264 |
| CP006690 | 21162 | .....T.....T.....T.....                                      | .....            | 21103 |
| CP001084 | 21671 | .....T.....T.....T.....                                      | .....            | 21612 |
| CP005486 | 19842 | .....T.....T.....T.....                                      | .....            | 19783 |
| CP005484 | 24187 | ..C..T..T.....T..T...C..T...C....C..T.....C                  | .....            | 24128 |
| AP012544 | 21488 | ..CA..T.....T.....C..T..C..C....C...C..TTC                   | .....            | 21547 |
| AP011548 | 30148 | ..C..T..T.....T..T...C...C...C...T...C                       | .....            | 30089 |
| FM179322 | 30148 | ..C..T..T.....T..T...C...C...C...T...C                       | .....            | 30089 |
| Query    | 1149  | CCAAGGCGGCATGGGCTTCAGCTCACCAACCGGCCCGAACACCCAAACCATCTCTGGTG  |                  | 1208  |
| HE970764 | 22260 | .....                                                        | .....            | 22201 |
| CP002618 | 22261 | .....                                                        | .....            | 22202 |
| CP002616 | 22261 | .....                                                        | .....            | 22202 |
| FM177140 | 22263 | .....                                                        | .....            | 22204 |
| CP006690 | 21102 | .....                                                        | .....            | 21043 |
| CP001084 | 21611 | .....                                                        | .....            | 21552 |
| CP005486 | 19782 | .....                                                        | .....            | 19723 |
| CP005484 | 24127 | T.....T.....T.....G.....                                     | .....            | 24068 |
| AP012544 | 21548 | .....G.....C..                                               | .....            | 21607 |
| AP011548 | 30088 | T.....T.....T.....G.....                                     | .....            | 30029 |
| FM179322 | 30088 | T.....T.....T.....G.....                                     | .....            | 30029 |
| Query    | 1209  | AAGCAGTTACGTTTATATCCACCGGTAA                                 |                  | 1236  |
| HE970764 | 22200 | .....                                                        | .....            | 22173 |
| CP002618 | 22201 | .....                                                        | .....            | 22174 |
| CP002616 | 22201 | .....                                                        | .....            | 22174 |
| FM177140 | 22203 | .....                                                        | .....            | 22176 |
| CP006690 | 21042 | .....C.....                                                  | .....            | 21015 |
| CP001084 | 21551 | .....C.....                                                  | .....            | 21524 |

|          |       |                    |       |
|----------|-------|--------------------|-------|
| CP005486 | 19722 | .....C.....        | 19695 |
| CP005484 | 24067 | C.....C.....C..... | 24040 |
| AP012544 | 21608 | .....C...AC.....   | 21635 |
| AP011548 | 30028 | C.....C.....C..... | 30001 |
| FM179322 | 30028 | C.....C.....C..... | 30001 |

**Table S5.- Blast alignment of *L.casei/paracasei/rhamnosus* genes encoding P75 proteins for the selection of PCR primers**

Database: Nucleotide collection (nt)  
 36,527,618 sequences; 117,866,738,766 total letters  
 Query= gi|191636824|ref|NC\_010999.1| Lactobacillus casei BL23 complete genome, strain BL23

Length=3079196

| Sequences producing significant alignments:                      | Score (Bits) | E Value |
|------------------------------------------------------------------|--------------|---------|
| emb HE970764.1  Lactobacillus casei W56 complete genome          | 2743         | 0.0     |
| gb CP002618.1  Lactobacillus casei BD-II, complete genome        | 2743         | 0.0     |
| gb CP002616.1  Lactobacillus casei LC2W, complete genome         | 2743         | 0.0     |
| emb FM177140.1  Lactobacillus casei BL23 complete genome, str... | 2743         | 0.0     |
| gb CP006690.1  Lactobacillus casei 12A, complete genome          | 2604         | 0.0     |
| gb CP001084.2  Lactobacillus casei str. Zhang, complete genome   | 2379         | 0.0     |
| gb CP005486.1  Lactobacillus casei LOCK919, complete genome      | 2379         | 0.0     |
| gb CP005484.1  Lactobacillus rhamnosus LOCK900, complete genome  | 420          | 2e-116  |
| dbj AP011548.1  Lactobacillus rhamnosus ATCC 53103 DNA, compl... | 420          | 2e-116  |
| emb FM179322.1  Lactobacillus rhamnosus GG whole genome seque... | 420          | 2e-116  |
| gb CP014645.1  Lactobacillus rhamnosus strain ASCC 290 genome    | 409          | 4e-113  |
| emb LT220504.1  Lactobacillus rhamnosus strain BPL5 genome as... | 409          | 4e-113  |
| gb CP005485.1  Lactobacillus rhamnosus LOCK908, complete genome  | 409          | 4e-113  |
| gb CP003094.1  Lactobacillus rhamnosus ATCC 8530, complete ge... | 409          | 4e-113  |
| emb FM179323.1  Lactobacillus rhamnosus Lc 705 whole genome s... | 409          | 4e-113  |

ALIGNMENTS

|          |         |                                                                |         |
|----------|---------|----------------------------------------------------------------|---------|
| Query    | 277055  | ATGGTAGATGCAAAGAAAGTATTGTCTACGTTACGGCAGGATTCGTTGGTGCTGCCGGTTTG | 277114  |
| HE970764 | 277026  | .....                                                          | 277085  |
| CP002618 | 274360  | .....                                                          | 274419  |
| CP002616 | 277061  | .....                                                          | 277120  |
| FM177140 | 277055  | .....                                                          | 277114  |
| CP006690 | 294753  | .....                                                          | 294812  |
| CP001084 | 294624  | .....                                                          | 294683  |
| CP005486 | 290686  | .....                                                          | 290745  |
| CP005484 | 295348  | .....T.T.....A.....C.....C..                                   | 295407  |
| AP011548 | 324696  | .....T.T.....A.....C.....C..                                   | 324755  |
| FM179322 | 325672  | .....T.T.....A.....C.....C..                                   | 325731  |
| CP014645 | 102073  | .....T.T.....A.....C.....C..                                   | 102132  |
| LT220504 | 1953631 | .....T.T.....A.....C.....C..                                   | 1953572 |
| CP005485 | 315086  | .....T.T.....A.....C.....C..                                   | 315145  |
| CP003094 | 307877  | .....T.T.....A.....C.....C..                                   | 307936  |
| FM179323 | 307701  | .....T.T.....A.....C.....C..                                   | 307760  |
| Query    | 277115  | GCAACTTAGCTACCGCGCTAATACTGTTCCGCTTCAACGGGGACAGTCAATTACAAA      | 277174  |
| HE970764 | 277086  | .....                                                          | 277145  |
| CP002618 | 274420  | .....                                                          | 274479  |
| CP002616 | 277121  | .....                                                          | 277180  |
| FM177140 | 277115  | .....                                                          | 277174  |
| CP006690 | 294813  | .....                                                          | 294872  |
| CP001084 | 294684  | .....                                                          | 294743  |
| CP005486 | 290746  | .....                                                          | 290805  |
| CP005484 | 295408  | ..GG.....A.....A..C.....C.....T..A..G..A.....G.....G.....      | 295467  |
| AP011548 | 324756  | ..GG.....A.....A..C.....C.....T..A..G..A.....G.....G.....      | 324815  |
| FM179322 | 325732  | ..GG.....A.....A..C.....C.....T..A..G..A.....G.....G.....      | 325791  |
| CP014645 | 102133  | ..GG.....A.....A..C.....C.....T..A..G..A.....G.....G.....      | 102192  |
| LT220504 | 1953571 | ..GG.....A.....A..C.....C.....T..A..G..A.....G.....G.....      | 1953512 |
| CP005485 | 315146  | ..GG.....A.....A..C.....C.....T..A..G..A.....G.....G.....      | 315205  |
| CP003094 | 307937  | ..GG.....A.....A..C.....C.....T..A..G..A.....G.....G.....      | 307996  |

|          |         |                                                                        |         |
|----------|---------|------------------------------------------------------------------------|---------|
| FM179323 | 307761  | ..GG.....A.....A..C.....C.....T..A..G..A.....G.....G.....              | 307820  |
| Query    | 277175  | TCGGGTGC <b>GACCACCGTATGGAATAGTCC</b> ATCATGGCATCAAGTAAACGCTATGTGACT   | 277234  |
| HE970764 | 277146  | .....                                                                  | 277205  |
| CP002618 | 274480  | .....                                                                  | 274539  |
| CP002616 | 277181  | .....                                                                  | 277240  |
| FM177140 | 277175  | .....                                                                  | 277234  |
| CP006690 | 294873  | .....                                                                  | 294932  |
| CP001084 | 294744  | .....                                                                  | 294803  |
| CP005486 | 290806  | .....                                                                  | 290865  |
| CP005484 | 295468  | ..C.....C.....C.....C.....                                             | 295527  |
| AP011548 | 324816  | ..C.....C.....C.....C.....                                             | 324875  |
| FM179322 | 325792  | ..C.....C.....C.....C.....                                             | 325851  |
| CP014645 | 102193  | ..C.....C.....C.....C.....                                             | 102252  |
| LT220504 | 1953511 | ..C.....C.....C.....C.....                                             | 1953452 |
| CP005485 | 315206  | ..C.....C.....C.....C.....                                             | 315265  |
| CP003094 | 307997  | ..C.....C.....C.....C.....                                             | 308056  |
| FM179323 | 307821  | ..C.....C.....C.....C.....                                             | 307880  |
| Query    | 277235  | TTTGGTGACAAAGTACAAGTTCTAGGTCAAAAAGTTGACCGAAACGGTGCTACTTGGTAT           | 277294  |
| HE970764 | 277206  | .....                                                                  | 277265  |
| CP002618 | 274540  | .....                                                                  | 274599  |
| CP002616 | 277241  | .....                                                                  | 277300  |
| FM177140 | 277235  | .....                                                                  | 277294  |
| CP006690 | 294933  | .....                                                                  | 294992  |
| CP001084 | 294804  | .....                                                                  | 294863  |
| CP005486 | 290866  | .....                                                                  | 290925  |
| CP005484 | 295528  | .....C....CG..G..GC.AT....A...CC.....A..T.....                         | 295587  |
| AP011548 | 324876  | .....G....CG..G..GC.AT.G...A...CC.....A..T.....                        | 324935  |
| FM179322 | 325852  | .....G....CG..G..GC.AT.G...A...CC.....A..T.....                        | 325911  |
| CP014645 | 102253  | .....C....CG..G..GC.AT....A...CC.....A..T.....                         | 102312  |
| LT220504 | 1953451 | .....C....CG..G..GC.AT....A...CC.....A..T.....                         | 1953392 |
| CP005485 | 315266  | .....C....CG..G..GC.AT....A...CC.....A..T.....                         | 315325  |
| CP003094 | 308057  | .....C....CG..G..GC.AT....A...CC.....A..T.....                         | 308116  |
| FM179323 | 307881  | .....C....CG..G..GC.AT....A...CC.....A..T.....                         | 307940  |
| Query    | 277295  | AAAGTC <b>CGCGACAATCAGTGGATCC</b> CTCATT-TATTGAATTTTGACGGCAAGACTGT     | 277353  |
| HE970764 | 277266  | .....                                                                  | 277324  |
| CP002618 | 274600  | .....                                                                  | 274658  |
| CP002616 | 277301  | .....                                                                  | 277359  |
| FM177140 | 277295  | .....                                                                  | 277353  |
| CP006690 | 294993  | .....GG.....                                                           | 295051  |
| CP001084 | 294864  | .....GG.....                                                           | 294922  |
| CP005486 | 290926  | .....GG.....                                                           | 290984  |
| CP005484 | 295588  | .....T.....T...GGA-...G.....G...CG..T..A..G.C                          | 295646  |
| AP011548 | 324936  | .....T.....T...GGA-...G.....G...CG..T..A..G.C                          | 324994  |
| FM179322 | 325912  | .....T.....T...GGA-...G.....G...CG..T..A..G.C                          | 325970  |
| CP014645 | 102313  | .....T.....T...GGA-...G.....G...CG..T..A..G.C                          | 102371  |
| LT220504 | 1953391 | .....T.....T...GGA-...G.....G...CG..T..A..G.C                          | 1953333 |
| CP005485 | 315326  | .....T.....T...GGA-...G.....G...CG..T..A..G.C                          | 315384  |
| CP003094 | 308117  | .....T.....T...GGA-...G.....G...CG..T..A..G.C                          | 308175  |
| FM179323 | 307941  | .....T.....T...GGA-...G.....G...CG..T..A..G.C                          | 307999  |
| Query    | 277354  | CACCGTTC <b>CAAGCACC-AGAACA</b> AACTGCCAGTCAGGCACCGGTTAGCCAAGCGCCAGCTA | 277412  |
| HE970764 | 277325  | .....                                                                  | 277383  |
| CP002618 | 274659  | .....                                                                  | 274717  |
| CP002616 | 277360  | .....                                                                  | 277418  |
| FM177140 | 277354  | .....                                                                  | 277412  |
| CP006690 | 295052  | .....                                                                  | 295110  |
| CP001084 | 294923  | .....                                                                  | 294981  |
| CP005486 | 290985  | .....                                                                  | 291043  |
| CP005484 | 295647  | .....G...G..A...G..TT.GG-.A..A...AA.TG.T..C.....A..G...                | 295705  |
| AP011548 | 324995  | .....G...G..A...G..TT.GG-.A..A...AA.TG.T..C.....A..G...                | 325053  |
| FM179322 | 325971  | .....G...G..A...G..TT.GG-.A..A...AA.TG.T..C.....A..G...                | 326029  |
| CP014645 | 102372  | .....G...G..A...G..TT.GG-.A..A...AA.TG.T..C.....A..G...                | 102430  |
| LT220504 | 1953332 | .....G...G..A...G..TT.GG-.A..A...AA.TG.T..C.....A..G...                | 1953274 |
| CP005485 | 315385  | .....G...G..A...G..TT.GG-.A..A...AA.TG.T..C.....A..G...                | 315443  |
| CP003094 | 308176  | .....G...G..A...G..TT.GG-.A..A...AA.TG.T..C.....A..G...                | 308234  |
| FM179323 | 308000  | .....G...G..A...G..TT.GG-.A..A...AA.TG.T..C.....A..G...                | 308058  |
| Query    | 277413  | GCCAAGCACCTG <b>CAAGTCAGGCACCTGCGAGTCAAGCAGC--C-GCAC-AG--CCTGATA</b>   | 277466  |
| HE970764 | 277384  | .....                                                                  | 277437  |
| CP002618 | 274718  | .....                                                                  | 274771  |

|          |         |                                                              |         |
|----------|---------|--------------------------------------------------------------|---------|
| CP002616 | 277419  | .....--.-.....                                               | 277472  |
| FM177140 | 277413  | .....--.-.....                                               | 277466  |
| CP006690 | 295111  | .....--.-.....                                               | 295164  |
| CP001084 | 294982  | .....--.-.....                                               | 295035  |
| CP005486 | 291044  | .....--.-.....                                               | 291097  |
| CP005484 | 295706  | .T.G.G.A...C.A...A.A.CC..A.C.TG.A...C.CAAA.C...              | 295765  |
| AP011548 | 325054  | .T.G.G.A...C.A...A.A.CC..A.C.TG.A...C.CAAA.C...              | 325113  |
| FM179322 | 326030  | .T.G.G.A...C.A...A.A.CC..A.C.TG.A...C.CAAA.C...              | 326089  |
| CP014645 | 102431  | .T.G.G.A...C.A...A.A.CC..A.C.TG.A...C.CAAA.C...              | 102490  |
| LT220504 | 1953273 | .T.G.G.A...C.A...A.A.CC..A.C.TG.A...C.CAAA.C...              | 1953214 |
| CP005485 | 315444  | .T.G.G.A...C.A...A.A.CC..A.C.TG.A...C.CAAA.C...              | 315503  |
| CP003094 | 308235  | .T.G.G.A...C.A...A.A.CC..A.C.TG.A...C.CAAA.C...              | 308294  |
| FM179323 | 308059  | .T.G.G.A...C.A...A.A.CC..A.C.TG.A...C.CAAA.C...              | 308118  |
| Query    | 277467  | CCCAGACAGC-AA-ACATTCAGTTATATGTTAAAAACATTGGTTCTGCAGTCACAGTTG  | 277524  |
| HE970764 | 277438  | .....-.-.....                                                | 277495  |
| CP002618 | 274772  | .....-.-.....                                                | 274829  |
| CP002616 | 277473  | .....-.-.....                                                | 277530  |
| FM177140 | 277467  | .....-.-.....                                                | 277524  |
| CP006690 | 295165  | .....-.-.....                                                | 295222  |
| CP001084 | 295036  | .....-C.....C.....                                           | 295093  |
| CP005486 | 291098  | .....-C.....C.....                                           | 291155  |
| CP005484 | 295766  | ...A...T.T...--..C.T...C.G.T.C...A...T.C.A..                 | 295823  |
| AP011548 | 325114  | ...A...T.T...--..C.T...C.G.T.C...A...T.C.A..                 | 325171  |
| FM179322 | 326090  | ...A...T.T...--..C.T...C.G.T.C...A...T.C.A..                 | 326147  |
| CP014645 | 102491  | ...A...T.T...--..C.T...C.G.T.C...A...T.C.A..                 | 102548  |
| LT220504 | 1953213 | ...A...T.T...--..C.T...C.G.T.C...A...T.C.A..                 | 1953156 |
| CP005485 | 315504  | ...A...T.T...--..C.T...C.G.T.C...A...T.C.A..                 | 315561  |
| CP003094 | 308295  | ...A...T.T...--..C.T...C.G.T.C...A...T.C.A..                 | 308352  |
| FM179323 | 308119  | ...A...T.T...--..C.T...C.G.T.C...A...T.C.A..                 | 308176  |
| Query    | 277525  | GGCAACACCAGCGTACAGTCAGGCAACTGGCCAGTATCTGGAAGGCAACCAGACGTTGAC | 277584  |
| HE970764 | 277496  | .....                                                        | 277555  |
| CP002618 | 274830  | .....                                                        | 274889  |
| CP002616 | 277531  | .....                                                        | 277590  |
| FM177140 | 277525  | .....                                                        | 277584  |
| CP006690 | 295223  | .....                                                        | 295282  |
| CP001084 | 295094  | .....                                                        | 295153  |
| CP005486 | 291156  | .....                                                        | 291215  |
| CP005484 | 295824  | .A...C.G...T.C...T.G.A.T.A...A...G...AC...                   | 295883  |
| AP011548 | 325172  | .A...C.G...T.C...T.G.A.T.A...A...G...AC...                   | 325231  |
| FM179322 | 326148  | .A...C.G...T.C...T.G.A.T.A...A...G...AC...                   | 326207  |
| CP014645 | 102549  | .A...C.G...T.C...T.G.A.T.A...A...G...AC...                   | 102608  |
| LT220504 | 1953155 | .A...C.G...T.C...T.G.A.T.A...A...G...AC...                   | 1953096 |
| CP005485 | 315562  | .A...C.G...T.C...T.G.A.T.A...A...G...AC...                   | 315621  |
| CP003094 | 308353  | .A...C.G...T.C...T.G.A.T.A...A...G...AC...                   | 308412  |
| FM179323 | 308177  | .A...C.G...T.C...T.G.A.T.A...A...G...AC...                   | 308236  |
| Query    | 277585  | GGCGGTTGCCAGTTGCAAGCCAATGGCGAAACATGGTATCGGTTAGCAAATGGCGGTTA  | 277644  |
| HE970764 | 277556  | .....                                                        | 277615  |
| CP002618 | 274890  | .....                                                        | 274949  |
| CP002616 | 277591  | .....                                                        | 277650  |
| FM177140 | 277585  | .....                                                        | 277644  |
| CP006690 | 295283  | .....                                                        | 295342  |
| CP001084 | 295154  | .....                                                        | 295213  |
| CP005486 | 291216  | .....                                                        | 291275  |
| CP005484 | 295884  | ..T.....CA...A.C...C.T.C.C.....                              | 295943  |
| AP011548 | 325232  | ..T.....CA...A...T.....C.T.C.C.....                          | 325291  |
| FM179322 | 326208  | ..T.....CA...A...T.....C.T.C.C.....                          | 326267  |
| CP014645 | 102609  | ..T.....CA...A...T.....G.....C.T.C.C.....                    | 102668  |
| LT220504 | 1953095 | ..T.....CA...A...T.....G.....C.T.C.C.....                    | 1953036 |
| CP005485 | 315622  | ..T.....CA...A...T.....G.....C.T.C.C.....                    | 315681  |
| CP003094 | 308413  | ..T.....CA...A...T.....G.....C.T.C.C.....                    | 308472  |
| FM179323 | 308237  | ..T.....CA...A...T.....G.....C.T.C.C.....                    | 308296  |
| Query    | 277645  | CGTGCCAGAACGTTTTGCTAGCACAAACCTGCACCAGCACCAGTCATCTGCTGCAAC    | 277704  |
| HE970764 | 277616  | .....                                                        | 277675  |
| CP002618 | 274950  | .....                                                        | 275009  |
| CP002616 | 277651  | .....                                                        | 277710  |
| FM177140 | 277645  | .....                                                        | 277704  |
| CP006690 | 295343  | .....                                                        | 295402  |
| CP001084 | 295214  | .....                                                        | 295273  |
| CP005486 | 291276  | .....                                                        | 291335  |

|          |         |                                                               |         |
|----------|---------|---------------------------------------------------------------|---------|
| CP005484 | 295944  | T..T..T.C...G....T.....                                       | 295973  |
| AP011548 | 325292  | T..T..T.C...G....T.....                                       | 325321  |
| FM179322 | 326268  | T..T..T.C...G....T.....                                       | 326297  |
| CP014645 | 102669  | T..T..T.C...G....T.....                                       | 102695  |
| LT220504 | 1953035 | T..T..T.C...G....T.....G..                                    | 1953006 |
| CP005485 | 315682  | T..T..T.C...G....T.....                                       | 315708  |
| CP003094 | 308473  | T..T..T.C...G....T.....                                       | 308499  |
| FM179323 | 308297  | T..T..T.C...G....T.....                                       | 308323  |
| Query    | 277705  | GAGTGTTCGGCACCCTGCGCCTGTATCTGATGCAACGGCTTCGAACGCAGCTGCTTC     | 277764  |
| HE970764 | 277676  | .....                                                         | 277735  |
| CP002618 | 275010  | .....                                                         | 275069  |
| CP002616 | 277711  | .....                                                         | 277770  |
| FM177140 | 277705  | .....                                                         | 277764  |
| CP006690 | 295403  | .....                                                         | 295462  |
| CP001084 | 295274  | .....                                                         | 295328  |
| CP005486 | 291336  | .....                                                         | 291390  |
| Query    | 277765  | AAATGCCGCCGCTTCGGATGTTGCTGTCTCCAGTGCTGCAGCGTCTAGTGCCCGGGCTTC  | 277824  |
| HE970764 | 277736  | .....                                                         | 277795  |
| CP002618 | 275070  | .....                                                         | 275129  |
| CP002616 | 277771  | .....                                                         | 277830  |
| FM177140 | 277765  | .....                                                         | 277824  |
| CP006690 | 295463  | .....                                                         | 295522  |
| CP001084 | 295329  | -----C.....C.....C.....C.....T..A.....                        | 295378  |
| CP005486 | 291391  | -----C.....C.....C.....C.....T..A.....                        | 291440  |
| Query    | 277825  | ATTAGTGCCGCTTCAGAAGCTGCTG---CGGTTGCGAATGCTTCTAGCGCTGCTGCATC   | 277881  |
| HE970764 | 277796  | .....                                                         | 277852  |
| CP002618 | 275130  | .....                                                         | 275186  |
| CP002616 | 277831  | .....                                                         | 277887  |
| FM177140 | 277825  | .....                                                         | 277881  |
| CP006690 | 295523  | .....                                                         | 295579  |
| CP001084 | 295379  | ...G...T.....CTT.....A.....C.....                             | 295438  |
| CP005486 | 291441  | ...G...T.....CTT.....A.....C.....                             | 291500  |
| Query    | 277882  | -T-T-CTGC--T-GC-----C-GCTGTAG---CGAGTGCTGCCGCAGAAATCCAGTGCTGC | 277926  |
| HE970764 | 277853  | -.-.------.------.-----                                       | 277897  |
| CP002618 | 275187  | -.-.------.------.-----                                       | 275231  |
| CP002616 | 277888  | -.-.------.------.-----                                       | 277932  |
| FM177140 | 277882  | -.-.------.------.-----                                       | 277926  |
| CP006690 | 295580  | -.-.------.------.-----                                       | 295606  |
| CP001084 | 295439  | G.C.G...TG.A..GAGTG.T..C.C..AAT.C...A.G..T.....               | 295498  |
| CP005486 | 291501  | G.C.G...TG.A..GAGTG.T..C.C..AAT.C...A.G..T.....               | 291560  |
| Query    | 277927  | TGCAGAGTCCAGTGCTGCCGCATCGAAGGCTGCTGCTGATTCTAGCGCTGCAGCTGTGCA  | 277986  |
| HE970764 | 277898  | .....                                                         | 277957  |
| CP002618 | 275232  | .....                                                         | 275291  |
| CP002616 | 277933  | .....                                                         | 277992  |
| FM177140 | 277927  | .....                                                         | 277986  |
| CP006690 | 295607  | .....                                                         | 295666  |
| CP001084 | 295499  | .....A.....T.....T.....                                       | 295558  |
| CP005486 | 291561  | .....A.....T.....T.....                                       | 291620  |
| Query    | 277987  | GACTACGACGCCTGAGTCCAGTGCTGCGCCTGCAACGACACAGGTTGATGCAACTCAGGA  | 278046  |
| HE970764 | 277958  | .....                                                         | 278017  |
| CP002618 | 275292  | .....                                                         | 275351  |
| CP002616 | 277993  | .....                                                         | 278052  |
| FM177140 | 277987  | .....                                                         | 278046  |
| CP006690 | 295667  | .....                                                         | 295726  |
| CP001084 | 295559  | .....                                                         | 295618  |
| CP005486 | 291621  | .....                                                         | 291680  |
| Query    | 278047  | ACAGCAACAGCAGGCAGAACCAAGCAATACGGTCAATACCGAGGAAACGACAAATAACGC  | 278106  |
| HE970764 | 278018  | .....                                                         | 278077  |
| CP002618 | 275352  | .....                                                         | 275411  |
| CP002616 | 278053  | .....                                                         | 278112  |
| FM177140 | 278047  | .....                                                         | 278106  |
| CP006690 | 295727  | .....                                                         | 295786  |
| CP001084 | 295619  | .....T.....G.....                                             | 295678  |
| CP005486 | 291681  | .....T.....G.....                                             | 291740  |
| Query    | 278107  | GACGCCGACTCCTGCACCAACGCCGACGCTGCACCAACCCAGCCAGCTCCTGTAC       | 278166  |

|          |        |                                                               |        |
|----------|--------|---------------------------------------------------------------|--------|
| HE970764 | 278078 | .....                                                         | 278137 |
| CP002618 | 275412 | .....                                                         | 275471 |
| CP002616 | 278113 | .....                                                         | 278172 |
| FM177140 | 278107 | .....                                                         | 278166 |
| CP006690 | 295787 | .....                                                         | 295846 |
| CP001084 | 295679 | .....-----                                                    | 295732 |
| CP005486 | 291741 | .....-----                                                    | 291794 |
| Query    | 278167 | GCCGTCACGTCAGGCCAAAAATTCAGGCGGTTATCTCAATTGCTGAACAGCAAATTGGGAA | 278226 |
| HE970764 | 278138 | .....                                                         | 278197 |
| CP002618 | 275472 | .....                                                         | 275531 |
| CP002616 | 278173 | .....                                                         | 278232 |
| FM177140 | 278167 | .....                                                         | 278226 |
| CP006690 | 295847 | .....G.....                                                   | 295906 |
| CP001084 | 295733 | .....                                                         | 295792 |
| CP005486 | 291795 | .....                                                         | 291854 |
| Query    | 278227 | ACCTTATGTATGGGGTGGCAAGGGTCTTAACAGCTTTGACTGCTCAGGCTTGATGTATTA  | 278286 |
| HE970764 | 278198 | .....                                                         | 278257 |
| CP002618 | 275532 | .....                                                         | 275591 |
| CP002616 | 278233 | .....                                                         | 278292 |
| FM177140 | 278227 | .....                                                         | 278286 |
| CP006690 | 295907 | .....                                                         | 295966 |
| CP001084 | 295793 | .....                                                         | 295852 |
| CP005486 | 291855 | .....                                                         | 291914 |
| Query    | 278287 | TGCCTTTTTGAACGGCGCCGGTGTAAACATCGGTGGTTGGACAGTGCCACAAGAATCTTC  | 278346 |
| HE970764 | 278258 | .....                                                         | 278317 |
| CP002618 | 275592 | .....                                                         | 275651 |
| CP002616 | 278293 | .....                                                         | 278352 |
| FM177140 | 278287 | .....                                                         | 278346 |
| CP006690 | 295967 | .....                                                         | 296026 |
| CP001084 | 295853 | .....                                                         | 295912 |
| CP005486 | 291915 | .....                                                         | 291974 |
| Query    | 278347 | TGGTCAGCAAGTCTCACTGAGTGCAC TTCAGCCTGGTGATTGCTCTTCTGGGGCGGACA  | 278406 |
| HE970764 | 278318 | .....                                                         | 278377 |
| CP002618 | 275652 | .....                                                         | 275711 |
| CP002616 | 278353 | .....                                                         | 278412 |
| FM177140 | 278347 | .....                                                         | 278406 |
| CP006690 | 296027 | .....                                                         | 296086 |
| CP001084 | 295913 | .....                                                         | 295972 |
| CP005486 | 291975 | .....                                                         | 292034 |
| Query    | 278407 | TGGTAGCTCTTACCACGTAGCGCTCTACATTGGTGGCGGTACAATGATT CAGGCACCACA | 278466 |
| HE970764 | 278378 | .....                                                         | 278437 |
| CP002618 | 275712 | .....                                                         | 275771 |
| CP002616 | 278413 | .....                                                         | 278472 |
| FM177140 | 278407 | .....                                                         | 278466 |
| CP006690 | 296087 | .....                                                         | 296146 |
| CP001084 | 295973 | .....                                                         | 296032 |
| CP005486 | 292035 | .....                                                         | 292094 |
| Query    | 278467 | ACCAGGTGAAAATGTGAAGTACACGGCATTAGCTTACTTCATGCCTGATTTTGCTGTTCG  | 278526 |
| HE970764 | 278438 | .....                                                         | 278497 |
| CP002618 | 275772 | .....                                                         | 275831 |
| CP002616 | 278473 | .....                                                         | 278532 |
| FM177140 | 278467 | .....                                                         | 278526 |
| CP006690 | 296147 | .....T.....                                                   | 296206 |
| CP001084 | 296033 | .....T.....                                                   | 296092 |
| CP005486 | 292095 | .....T.....                                                   | 292154 |
| Query    | 278527 | TCCTTCACTATAA                                                 | 278539 |
| HE970764 | 278498 | .....                                                         | 278510 |
| CP002618 | 275832 | .....                                                         | 275844 |
| CP002616 | 278533 | .....                                                         | 278545 |
| FM177140 | 278527 | .....                                                         | 278539 |
| CP006690 | 296207 | .....                                                         | 296219 |
| CP001084 | 296093 | .....                                                         | 296105 |
| CP005486 | 292155 | .....                                                         | 292167 |



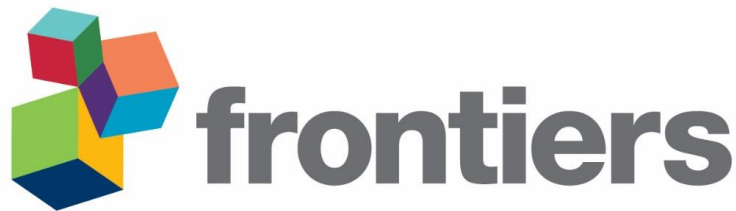

- Aramini, J.M., Rossi, P., Huang, Y.J., Zhao, L., Jiang, M., Maglaqui, M., Xiao, R., Locke, J., Nair, R., Rost, B., Acton, T.B., Inouye, M., and Montelione, G.T. (2008). Solution NMR Structure of the NlpC/P60 Domain of Lipoprotein Spr from *Escherichia coli*: Structural Evidence for a Novel Cysteine Peptidase Catalytic Triad. *Biochemistry* 47, 9715-9717.
- Källberg, M., Wang, H., Wang, S., Peng, J., Wang, Z., Lu, H., and Xu, J. (2012). Template-based protein structure modeling using the RaptorX web server. *Nature Protocols* 7, 1511.
- Kankainen, M., Paulin, L., Tynkkynen, S., Von Ossowski, I., Reunanen, J., Partanen, P., Satokari, R., Vesterlund, S., Hendrickx, A.P.A., Lebeer, S., De Keersmaecker, S.C.J., Vanderleyden, J., Hämäläinen, T., Laukkanen, S., Salovuori, N., Ritari, J., Alatalo, E., Korpela, R., Mattila-Sandholm, T., Lassig, A., Hatakka, K., Kinnunen, K.T., Karjalainen, H., Saxelin, M., Laakso, K., Surakka, A., Palva, A., Salusjärvi, T., Auvinen, P., and De Vos, W.M. (2009). Comparative genomic analysis of *Lactobacillus rhamnosus* GG reveals pili containing a human- mucus binding protein. *Proceedings of the National Academy of Sciences* 106, 17193-17198.
- Linares, D.M., Kok, J., and Poolman, B. (2010). Genome Sequences of *Lactococcus lactis* MG1363 (Revised) and NZ9000 and Comparative Physiological Studies. *Journal of Bacteriology* 192, 5806-5812.
- Makarova, K., Slesarev, A., Wolf, Y., Sorokin, A., Mirkin, B., Koonin, E., Pavlov, A., Pavlova, N., Karamychev, V., Polouchine, N., Shakhova, V., Grigoriev, I., Lou, Y., Rohksar, D., Lucas, S., Huang, K., Goodstein, D.M., Hawkins, T., Plengvidhya, V., Welker, D., Hughes, J., Goh, Y., Benson, A., Baldwin, K., Lee, J.-H., Díaz-Muñiz, I., Dosti, B., Smeianov, V., Wechter, W., Barabote, R., Lorca, G., Altermann, E., Barrangou, R., Ganesan, B., Xie, Y., Rawsthorne, H., Tamir, D., Parker, C., Breidt, F., Broadbent, J., Hutkins, R., O'sullivan, D., Steele, J., Unlu, G., Saier, M., Klaenhammer, T., Richardson, P., Kozyavkin, S., Weimer, B., and Mills, D. (2006). Comparative genomics of the lactic acid bacteria. *Proceedings of the National Academy of Sciences* 103, 15611-15616.
- Maze, A., Boel, G., Zuniga, M., Bourand, A., Loux, V., Yebra, M.J., Monedero, V., Correia, K., Jacques, N., Beaufils, S., Poncet, S., Joyet, P., Milohanic, E., Casaregola, S., Auffray, Y., Perez-Martinez, G., Gibrat, J.F., Zagorec, M., Francke, C., Hartke, A., and Deutscher, J.

- (2010). Complete Genome Sequence of the Probiotic *Lactobacillus casei* Strain BL23. *The Journal of Bacteriology* 192, 2647-2648.
- Siezen, R.J., Francke, C., Renckens, B., Boekhorst, J., Wels, M., Kleerebezem, M., and Van Hijum, S.a.F.T. (2012). Complete Resequencing and Reannotation of the *Lactobacillus plantarum* WCFS1 Genome. *Journal of Bacteriology* 194, 195-196.
- Van De Guchte, M., Penaud, S., Grimaldi, C., Barbe, V., Bryson, K., Nicolas, P., Robert, C., Oztas, S., Mangenot, S., Couloux, A., Loux, V., Dervyn, R., Bossy, R., Bolotin, A., Batto, J.-M., Walunas, T., Gibrat, J.-F., Bessières, P., Weissenbach, J., Ehrlich, S.D., and Maguin, E. (2006). The complete genome sequence of *Lactobacillus bulgaricus* reveals extensive and ongoing reductive evolution. *Proceedings of the National Academy of Sciences* 103, 9274-9279.
- Wang, S., Li, W., Liu, S., and Xu, J. (2016). RaptorX-Property: a web server for protein structure property prediction. *Nucleic Acids Research* 44, W430-W435.
- Waterhouse, A., Bertoni, M., Bienert, S., Studer, G., Tauriello, G., Gumienny, R., Heer, F.T., De Beer, T.a.P., Rempfer, C., Bordoli, L., Lepore, R., and Schwede, T. (2018). SWISS-MODEL: homology modelling of protein structures and complexes. *Nucleic Acids Research* 46, W296-W303.
- Wegmann, U., O'connell-Motherway, M., Zomer, A., Buist, G., Shearman, C., Canchaya, C., Ventura, M., Goesmann, A., Gasson, M.J., Kuipers, O.P., Van Sinderen, D., and Kok, J. (2007). Complete Genome Sequence of the Prototype Lactic Acid Bacterium *Lactococcus lactis* subsp. *cremoris* MG1363. *Journal of Bacteriology* 189, 3256-3270.
- Yan, F., Cao, H., Cover, T.L., Whitehead, R., Washington, M.K., and Polk, D.B. (2007). Soluble Proteins Produced by Probiotic Bacteria Regulate Intestinal Epithelial Cell Survival and Growth. *Gastroenterology* 132, 562-575.
